# Supplementary material for: SNP Discovery Using BSR-Seq Approach for Spot Blotch Resistance in Wheat (Triticum aestivum L.), an Essential Crop for Food Security
Source: Front Genet. 2022 Apr 5;13:859676. doi: 10.3389/fgene.2022.859676 (PMC9016274; doi:10.3389/fgene.2022.859676)
Supplement: Supplementary file 1 [file Table3.XLSX]

## Sheet: Sheet1
	Table 3 Blast2GO result of five transcripts of chromosome 3B and 5B
SeqName	Description	Length	#Hits	e-Value	GO IDs	GO Names
gnl_UG_Ta_S61799095	acetyl-CoA acetyltransferase, cytosolic 1	1406	20	0	F:GO:0003985; C:GO:0005777; P:GO:0006635	F:acetyl-CoA C-acetyltransferase activity; C:peroxisome; P:fatty acid beta-oxidation
gnl_UG_Ta_S17985740	cysteine proteinase 1	1109	20	3.803e-87	F:GO:0004197; C:GO:0005615; C:GO:0005764; P:GO:0051603	F:cysteine-type endopeptidase activity; C:extracellular space; C:lysosome; P:proteolysis involved in cellular protein catabolic process
gnl_UG_Ta_S61812294	non-specific phospholipase C1	3445	20	0	P:GO:0009395; F:GO:0016788	P:phospholipid catabolic process; F:hydrolase activity, acting on ester bonds
gnl_UG_Ta_S61830716	putative ubiquitin-like-specific protease 1B	2265	20	7.88615e-59	F:GO:0016787	F:hydrolase activity
gnl_UG_Ta_S65715070	A Chain A, Beta-D-glucan exohydrolase isoenzyme ExoI	1168	20	0	F:GO:0004553; P:GO:0005975; C:GO:0016021	F:hydrolase activity, hydrolyzing O-glycosyl compounds; P:carbohydrate metabolic process; C:integral component of membrane
